# Supplementary material
Source: PubMed Central journal article supplement (PMC2683052)
Supplement: emboj200978s2.pdf [file emboj200978s2.pdf]

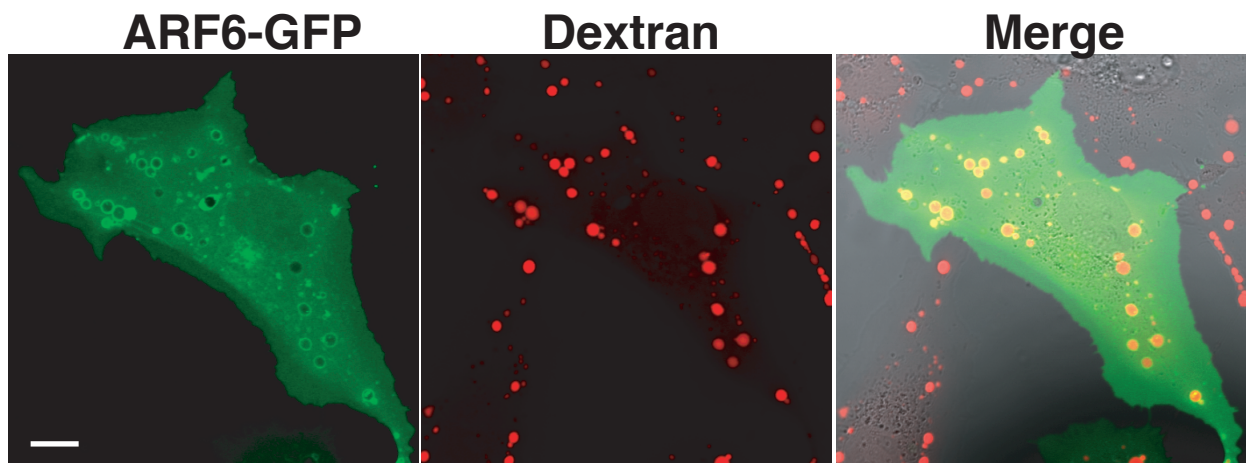

**Supplemental figure 2** Accumulation of ARF6 surrounding macropinosomes. COS7 cells were transiently transfected with an expression vector encoding ARF6-GFP. Two days after transfection cells were serum-starved for 1 h and stimulated with 100 ng/ml EGF in the presence of tetramethylrhodamine-labeled dextran for 8 min, washed, fixed and analyzed for macropinocytosis by confocal microscopy. Bar, 10  $\mu$ m. Note that ARF6 co-localized with macropinosomal membranes suggesting functional roles of ARF6 in macropinocytosis.
